# Supplementary material for: Binding of a single nitric oxide molecule is sufficient to disrupt DNA binding of the nitrosative stress regulator NsrR
Source: Royal Society of Chemistry journal article supplement (doi:10.1039/d4sc04618h), 2024-01-01
Supplement: d4sc04618h1.pdf [file d4sc04618h1.pdf]

## Supporting Information

### **Binding of a Single Nitric Oxide Molecule is Sufficient to Disrupt DNA Binding of the Nitrosative Stress Regulator NsrR**

Jason C. Crack and Nick E. Le Brun

## Supporting Tables

**Table S1.** Oligonucleotides used for SPR in this study. ReDCaT sequence is shown in red.

| Name                      | Sequence (5'→3')                                  |
|---------------------------|---------------------------------------------------|
| ReDCaT_F                  | Biotin//GCAGGAGGACGTAGGGTAGG                      |
| ReDCaT_R                  | CCTACCCTACGTCCTCCTGC                              |
| <i>hmpA1</i> _F           | TAAAACACGAATATCATCTACCAATTAAG                     |
| ReDCaT<br><i>hmpA1</i> _R | CTTAATTGGTAGATGATATTCGTGTTTTACCTACCCTACGTCCTCCTGC |
| <i>hmpA2</i> _F           | GAAAACAAGCATCTGAGATCCCAGTTCGG                     |
| ReDCaT<br><i>hmpA2</i> _R | AAGAACTGGGATCTCAGATGCTTGTTTTCCCTACCCTACGTCCTCCTGC |

**Table S2.** Oligonucleotides used for native MS in this study.

| <b>Name</b>             | <b>Sequence<br/>(5'→3')</b>    | <b>Mass<br/>(Da)</b> | <b><math>\epsilon_{260\text{ nm}}</math><br/>(<math>\text{mM}^{-1}</math><br/><math>\text{cm}^{-1}</math>)</b> |
|-------------------------|--------------------------------|----------------------|----------------------------------------------------------------------------------------------------------------|
| <i>hmpA1_F</i>          | AACACGAATATCATCTACCAAT         | 6655.38              | 223.5                                                                                                          |
| <i>hmpA1_R</i>          | ATTGGTAGATGATATTCGTGTT         | 6810.43              | 220.3                                                                                                          |
| <i>hmpA2_F</i>          | AACAAGCATCTGAGATCCCAGTT        | 7016.59              | 227.8                                                                                                          |
| <i>hmpA2_R</i>          | AACTGGGATCTCAGATGCTTGTT        | 7069.59              | 219.1                                                                                                          |
| <b>Cro <i>hmp_F</i></b> | GGATTTAATCTAATTAATAAATCCCAGGA  | 9221.04              | 311.8                                                                                                          |
| <b>Cro <i>hmp_R</i></b> | TCCTGGGATTTATTTAATTAGATTAAATCC | 9184.96              | 293.8                                                                                                          |

**Table S3.** Predicted and observed masses for all NsrR species.

| Species                                | Predicted mass <sup>a</sup><br>(Da) | Observed mass <sup>b</sup><br>(Da) | $\Delta$ Mass <sup>c</sup><br>(Da) |
|----------------------------------------|-------------------------------------|------------------------------------|------------------------------------|
| <b>(NsrR)<sub>2</sub></b>              |                                     |                                    |                                    |
| [apo]                                  | 31,909                              | 31,907                             | -2                                 |
| [hemi-apo]                             | 32,259                              | 32,257                             | -2                                 |
| [holo]                                 | 32,608                              | 32,608                             | 0                                  |
| <i>hmpA1</i> ::[apo]                   | 45,375                              | 45,373                             | -2                                 |
| <i>hmpA1</i> ::[hemi-apo]              | 45,723                              | 45,723                             | 0                                  |
| <i>hmpA1</i> ::[holo]                  | 46,075                              | 46,074                             | -1                                 |
| ( <i>hmpA1</i> ) <sub>2</sub> ::[holo] | 59,540                              | 59,541                             | +1                                 |
| <i>hmpA2</i> ::[holo]                  | 46,695                              | 46,694                             | -1                                 |
| <i>Cg hmp</i> ::[holo]                 | 51,015                              | 51,015                             | 0                                  |
|                                        |                                     |                                    |                                    |
| <b>Nitrosylated (NsrR)<sub>2</sub></b> |                                     |                                    |                                    |
| [holo]                                 | 32,608                              | 32,608                             | 0                                  |
| [holo](NO)                             | 32,639                              | 32,639                             | 0                                  |
| [holo](NO) <sub>2</sub>                | 32,669                              | 32,670                             | +1                                 |
| [hemi-apo]                             | 32,259                              | 32,258                             | -1                                 |
| [hemi-apo](NO)                         | 32,289                              | 32,288                             | -1                                 |
| [hemi-apo](NO) <sub>2</sub>            | 32,319                              | 32,319                             | 0                                  |

<sup>a</sup>The predicted mass depends on the cluster/cluster fragment charge because binding is assumed to be charge compensated <sup>1</sup>. Cluster charge states are as observed previously <sup>2,3</sup>.

<sup>b</sup>The average observed mass is derived from at least two independent experiments, with standard deviation of  $\pm 1$  Da. Deviation of - 2 Da are indicative of disulfide bond formation.

<sup>c</sup>The difference between the average observed and predicted masses.

## Supporting Figures

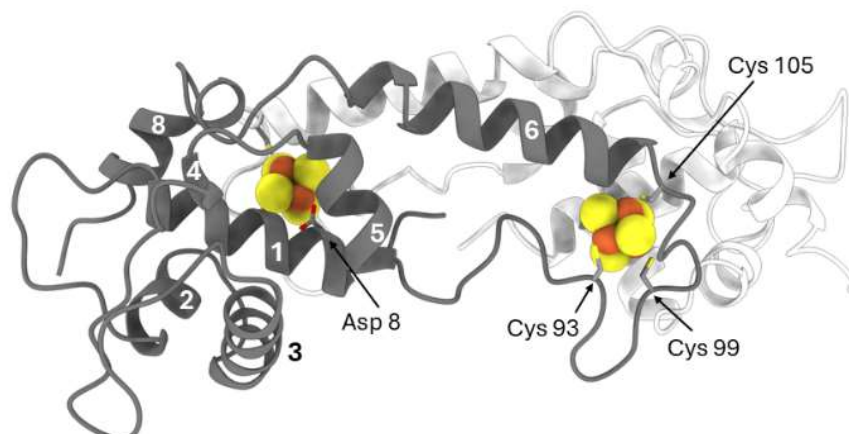

**Figure S1. Crystal structure of [4Fe-4S] NsrR (PDB 5NO7 4).** *S. coelicolor* NsrR is a homodimer, composed of elongated monomeric subunits (grey and white, respectively). Each subunit contains an N-terminal wHTH DNA-binding domain (helices 1 – 3), long dimerization helix (helix 6), and a C-terminal loop (between helices 5 & 6) that binds the [4Fe-4S] cluster. The cluster is an integral part of the inter-subunit connection network that correctly positions the recognition helices for DNA binding (see Fig. 1B).

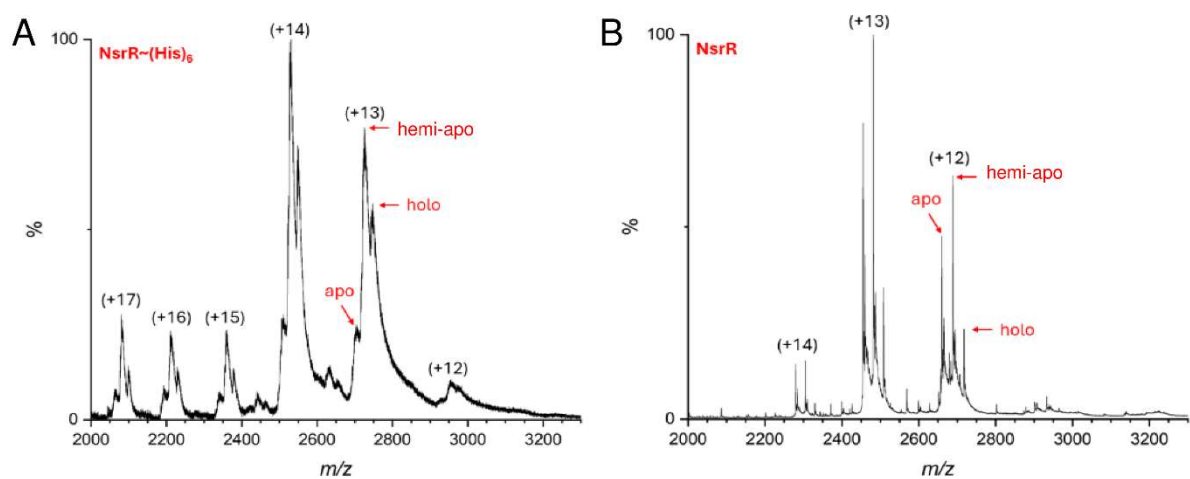

**Figure S2. Native MS of His-tagged and non-tagged [4Fe-4S] NsrR.** Comparison of  $m/z$  spectra for **A)** His-tagged NsrR and **B)** non-tagged [4Fe-4S] NsrR in the dimeric region. Charge states and peaks originating from apo, hemi-apo and holo NsrR are indicated. Samples contained 8  $\mu\text{M}$  [4Fe-4S] and were ionised from 100 mM ammonium acetate, pH 8.

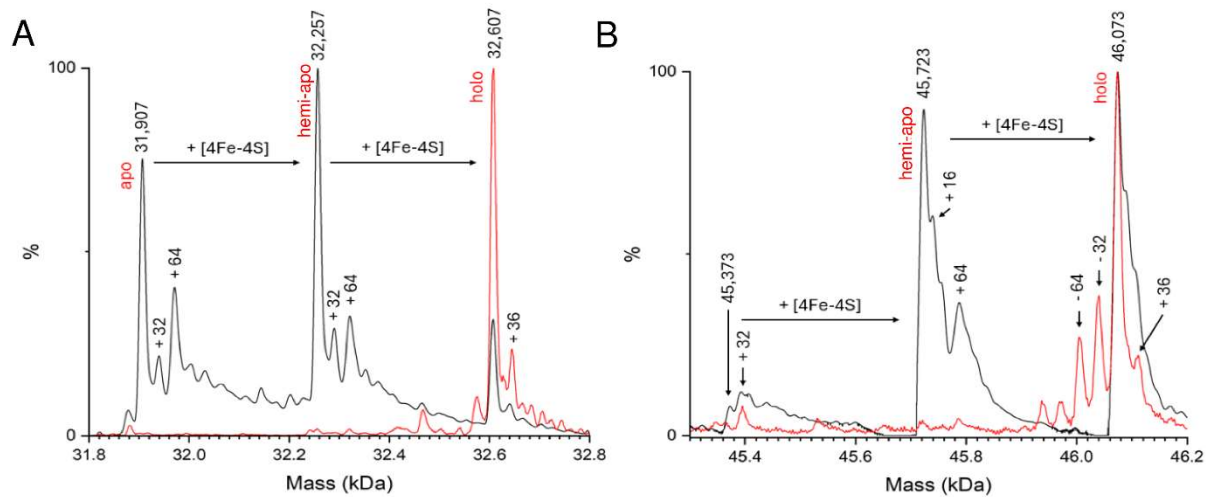

**Figure S3. Further detail of native MS data for [4Fe-4S] NsrR and NsrR-*hmpA1* complexes.** Deconvoluted spectra for as-isolated (black line) and reconstituted [4Fe-4S] NsrR (red line) **A**) before and **B**) after the addition of *hmpA1* DNA. **A**) shows the dimeric region of the spectrum, **B**) shows the region corresponding to NsrR-DNA complexes. Peaks originating from apo, hemi-apo and holo NsrR are indicated. Samples contained 8  $\mu$ M [4Fe-4S] and were ionised from 100 mM ammonium acetate, pH 8.

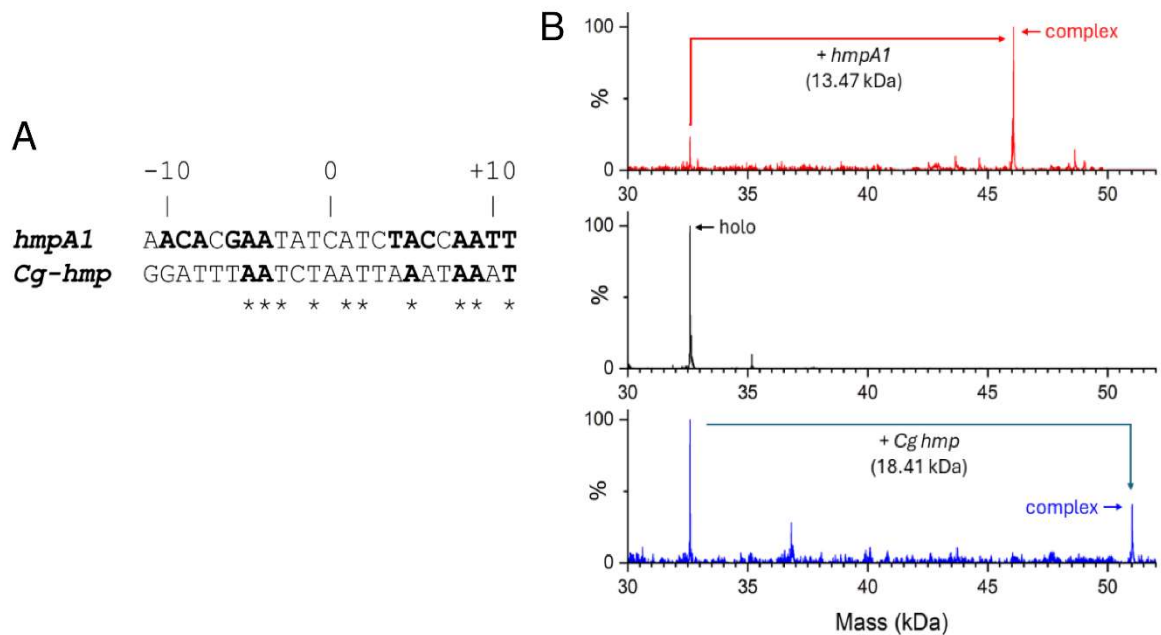

**Figure S4. NsrR can discriminate between *hmpA1* and non-cognate *Cg-hmp* DNA. A)** Sequences of *hmpA1* and *Cg-hmp* promoter DNA used in this study. Known protein-base interactions are shown in bold for the *hmpA1* promoter; bases occupying an identical position in the *Cg-hmp* promoter that may similarly interact with NsrR are shown in bold. The *Cg-hmp* promoter shares ~43% identity to *hmpA1*, with identical bases indicated by an asterisks. **B)** Dimeric NsrR (black line) can discriminate between cognate *hmpA1* (red line) and the non-cognate *Cg hmp* sequences (blue line), as judged from native MS data. Uncomplexed NsrR is more abundant in the presence of *Cg-hmp* than *hmp1A* promoter DNA, indicating sequence specificity is preserved during native MS experiments. NsrR (8  $\mu$ M [4Fe-4S]) was treated with a twofold excess of DNA (16  $\mu$ M DNA) prior to ionization.



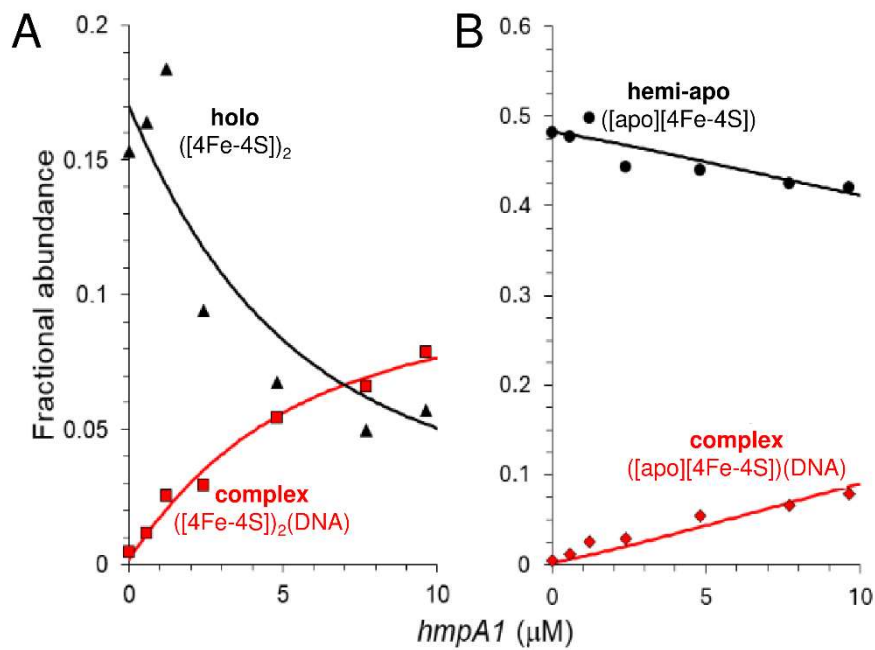

**Figure S5. Formation of [4Fe-4S] NsrR-*hmpA1* complexes with heterogeneous NsrR.** Annotated plots of relative intensity for **A)** holo NsrR and **B)** hemi-apo NsrR species as a function of the *hmpA1* concentration. Solid lines show fits of the data to a simple sequential binding model. This yielded a  $K_d$  of  $\sim 3$   $\mu\text{M}$  for the holo NsrR-*hmpA1* complex. For the hemi-apo NsrR complex, binding was weak and so only the first part of the binding was detected, from which a  $K_d$  of  $\sim 41$   $\mu\text{M}$  was estimated.

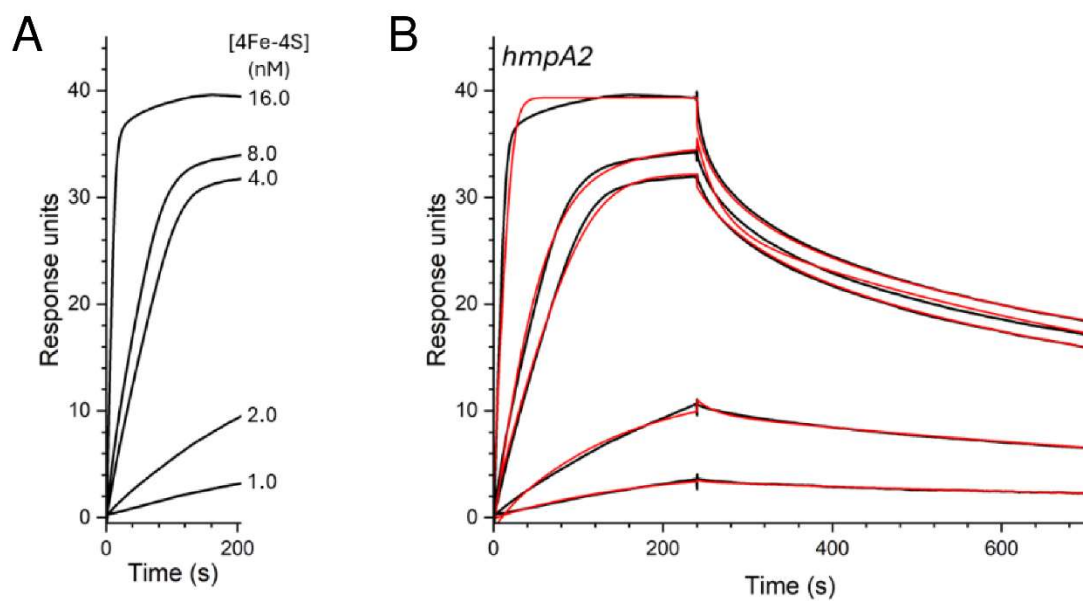

**Figure S6. Kinetics of NsrR-*hmpA2* complex formation and dissociation as measured by SPR. A)** Association phase form *hmpA2* promoter at varying concentrations of [4Fe-4S] NsrR, as indicated. **B)** Full association and dissociation phases (black line) of data shown in (A), together with fits to a bivalent analyte model (red line), with  $k_a = 2.25 \times 10^6 \text{ M}^{-1} \text{ s}^{-1}$  and  $k_d = 57.93 \times 10^{-3} \text{ s}^{-1}$ . Analysis temperature was 25 °C.

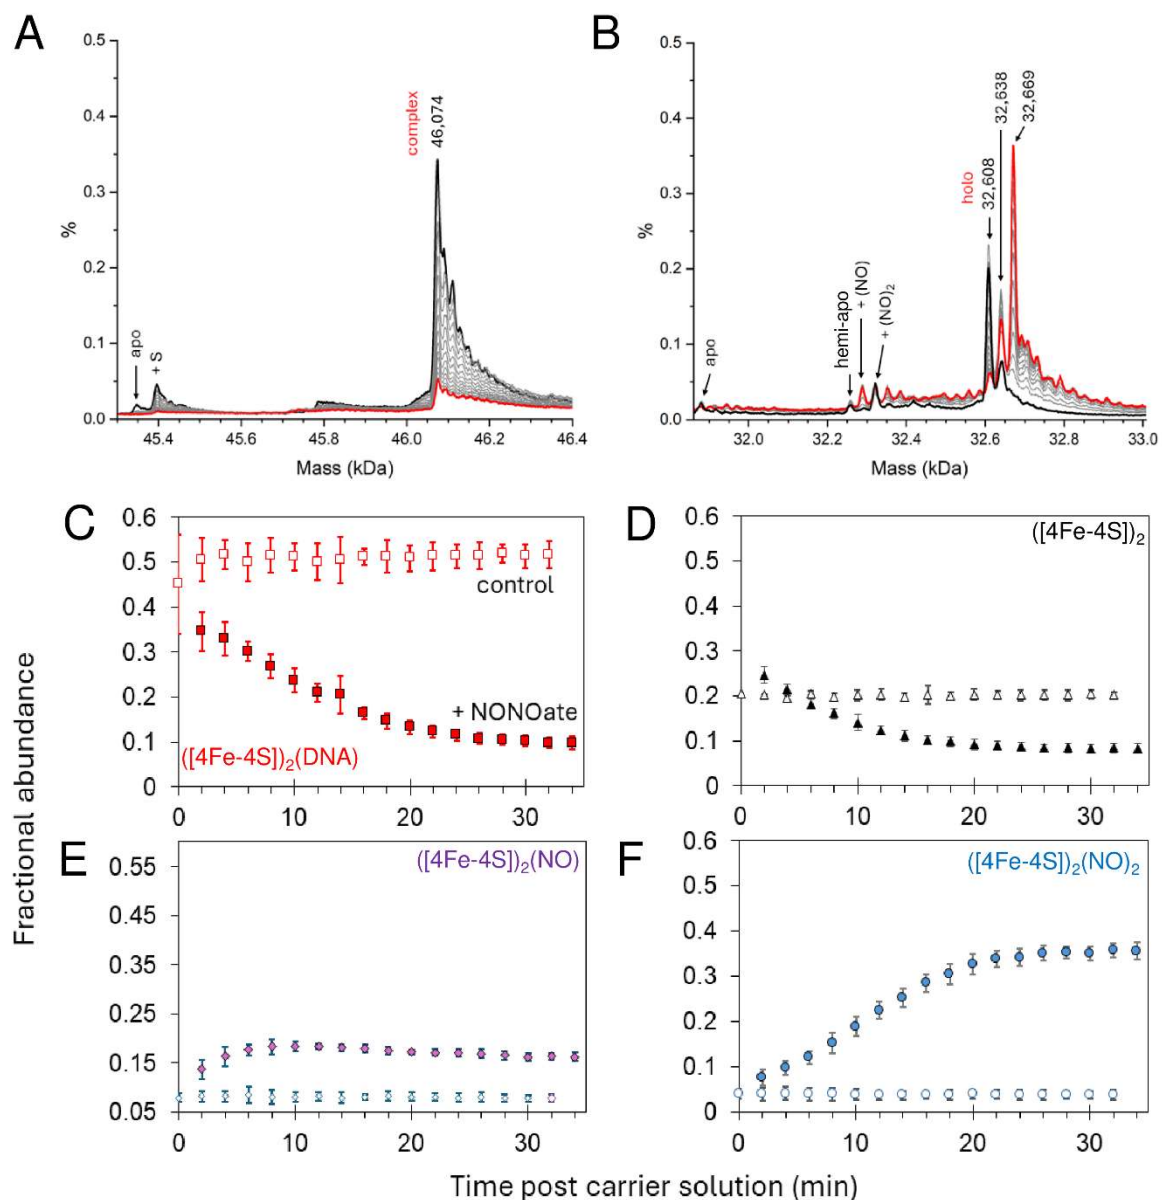

**Figure S7. Wide range deconvolution of in situ nitrosylation spectra.** Regions corresponding to **A**) *NsrR-hmpA1* complexes and **B**) NsrR dimers, before (black like) and after (red line) the addition of  $\sim 3.5$  [NO]:[4Fe-4S] cluster, as DEA-NONOate. Intervening spectra (grey) correspond to the incremental additions of  $\sim 0.2$  NO per cluster. The data are from the same experiments as those of Fig. 7, and are 2 min averages of collected data. **C - F**) Comparison of fractional abundance for temporal behaviour of *NsrR-hmpA1* samples treated with carrier solution in the presence (filled symbols) and absence (open symbols) of DEA NONOate. Sufficient DEA NONOate was added to release  $\sim 0.2$  [NO]:[4Fe-4S] over each 2 min period.

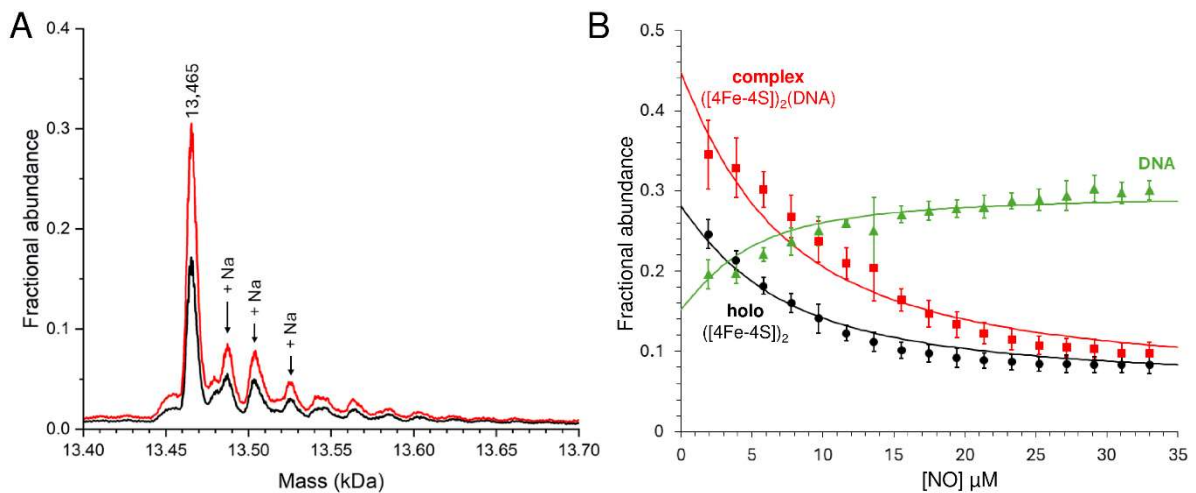

**Figure S8. Nitrosylation of NsrR-*hmpA1* complexes probed by native MS. A)** Deconvoluted native MS spectral region corresponding to unbound DNA before (black line) and after (red line) the addition of  $\sim 3.5$  [NO]:[4Fe-4S] cluster, as DEA-NONOate. Intervening spectra due to the incremental additions of  $\sim 0.2$  NO per cluster are omitted for clarity. The data are from the same experiments as those of Fig. 7, and are 2 min averages of collected data. **B)** Average ( $n=4$ ) fractional abundance of unbound DNA as a function of the [NO]:[4Fe-4S] ratio. Error bars represent standard deviations. Data from Figure 7 for the NsrR-*hmpA1* complex (red squares) and holo NsrR dimers (black circles) are shown for completeness. Solid lines represent fits using a simple equilibrium model (see Methods). Samples contained  $8 \mu\text{M}$  [4Fe-4S],  $8 \mu\text{M}$  *hmpA1* DNA.

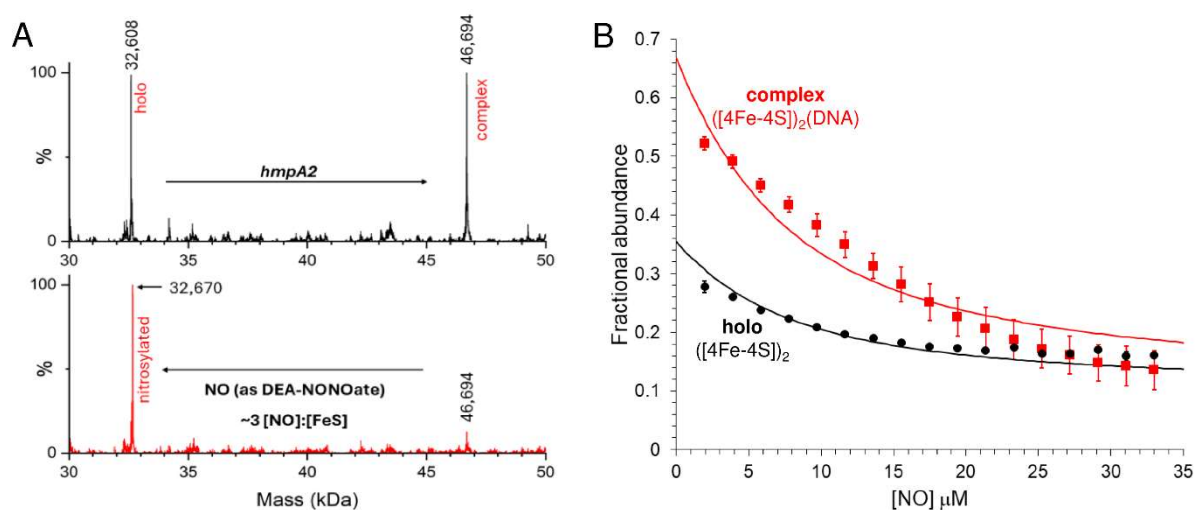

**Figure S9. Nitrosylation of NsrR-*hmpA2* complexes probed by native MS. A)** Comparison of NsrR-*hmpA2* complexes before (black line) and after (red line) the addition of NO (as DEA NONOate). The pre-addition spectrum contains both bound and unbound NsrR, consistent with relatively low affinity of NsrR for *hmpA2*. **B)** Average ( $n=2$ ) fractional abundance for the NsrR-*hmpA2* complex (red squares) and holo NsrR dimers (black circles) as a function of the [NO][4Fe-4S] ratio. Error bars represent standard deviations. Solid lines represent fits to the same equilibrium model used for *hmpA1*. Samples contained 8  $\mu$ M [4Fe-4S], 8  $\mu$ M *hmpA2* DNA.

### Supporting references

1. K. L. Kay, C. J. Hamilton and N. E. Le Brun, *Metallomics*, 2016, **8**, 709-719.
2. J. C. Crack and N. E. Le Brun, *Meth Mol Biol*, 2021, **2353**, 231-258.
3. J. C. Crack and N. E. Le Brun, *Chem Eur J*, 2019, **25**, 3675-3684.
4. A. Volbeda, E. L. Dodd, C. Darnault, J. C. Crack, O. Renoux, M. I. Hutchings, N. E. Le Brun and J. C. Fontecilla-Camps, *Nat Commun*, 2017, **8**, 15052.
